# Supplementary material for: The relationship between quantitative human epidermal growth factor receptor 2 gene expression by the 21-gene reverse transcriptase polymerase chain reaction assay and adjuvant trastuzumab benefit in Alliance N9831
Source: Springer Nature journal article supplement (doi:10.1186/s13058-015-0643-7), 2015-10-01
Supplement: MOESM4 [file 9781574]

Figure S2

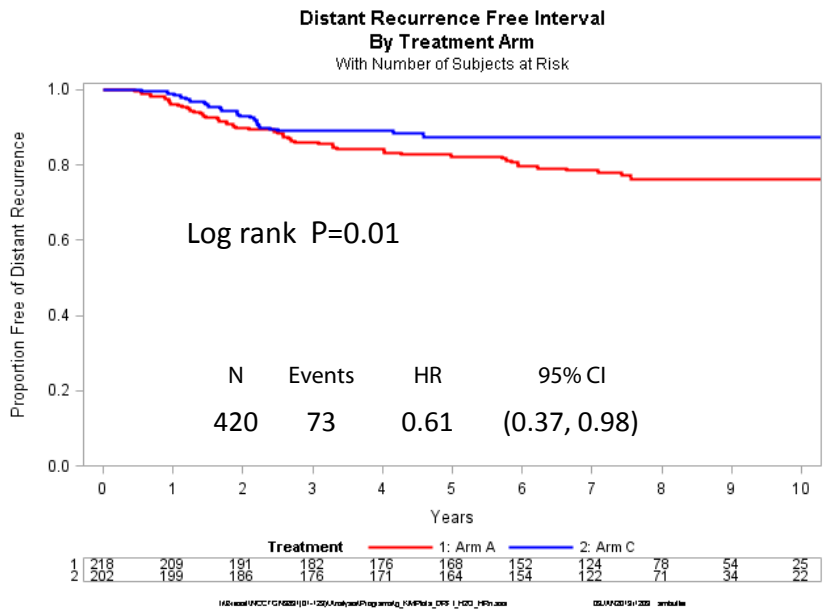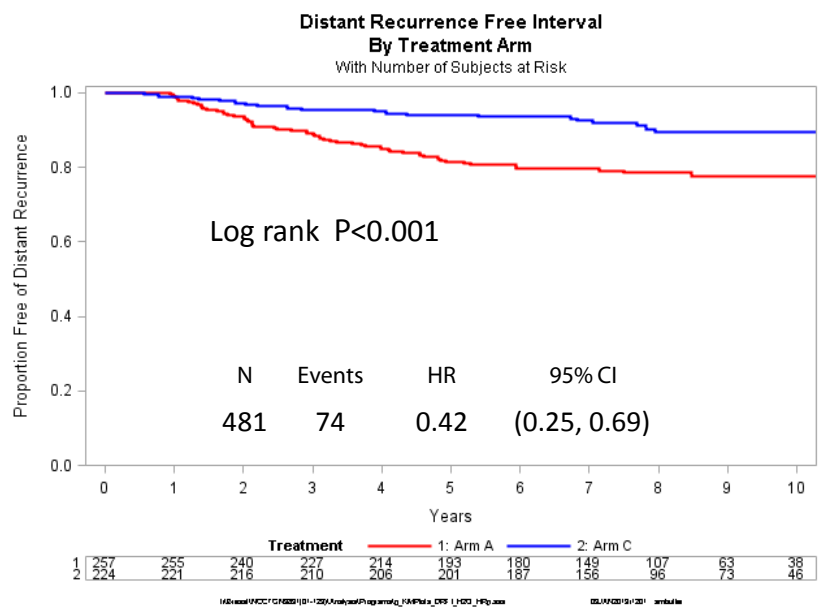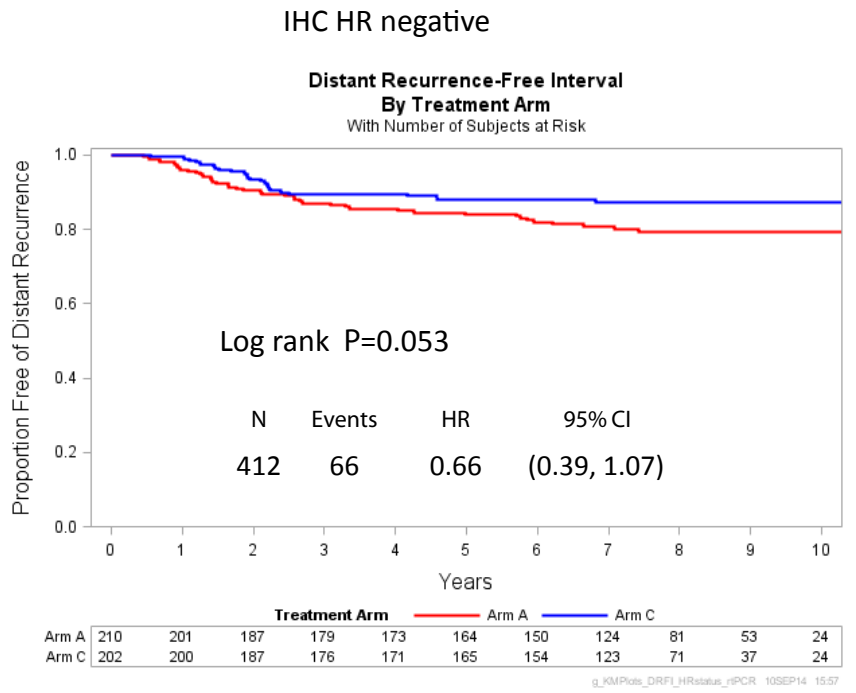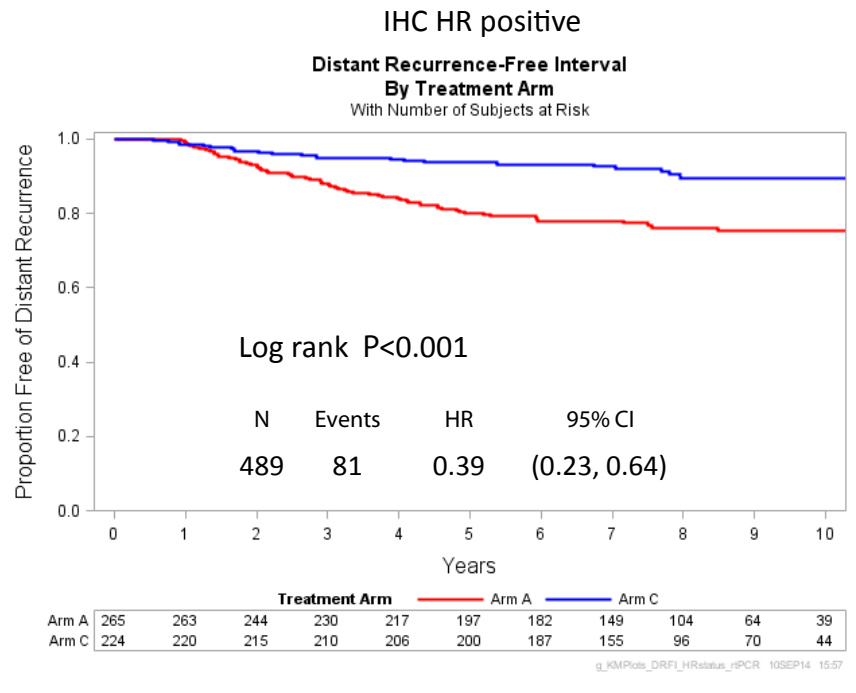

RT-PCR HR negative

RT-PCR HR positive
